# Supplementary material
Source: publisher figshare collection journal article supplement (https://tandf.figshare.com/articles/dataset/_/7370081)
Supplement: Supplementary file 1 [file 1]

**Supplemental Table 2.** List of the 152 non-glutinous Japanese rice cultivars, and their evaluation scores for endosperm enzyme activities and eating-quality traits in 2014. Each cultivar is classified in accordance with the items specified in the footnotes.

| Classification |                                       |                                         | Endosperm enzyme activity        |           |           |               |               |                 |                 |             |            |                 | Cooked Rice Taste Analyzer |                |            |          |            |                |             |                                       |                                       |                  | Tensipresser                          |               |               |                |                                       |                                       |                  |                                       |               |               |                  |            |                                       |           |                                       |                 |        |
|----------------|---------------------------------------|-----------------------------------------|----------------------------------|-----------|-----------|---------------|---------------|-----------------|-----------------|-------------|------------|-----------------|----------------------------|----------------|------------|----------|------------|----------------|-------------|---------------------------------------|---------------------------------------|------------------|---------------------------------------|---------------|---------------|----------------|---------------------------------------|---------------------------------------|------------------|---------------------------------------|---------------|---------------|------------------|------------|---------------------------------------|-----------|---------------------------------------|-----------------|--------|
| Accession name | NIAS Core Collection No. <sup>a</sup> | Landrace/Improved cultivar <sup>b</sup> | Year of development <sup>c</sup> | α-amylase | β-amylase | α-glucosidase | α-mannosidase | α-galactosidase | β-galactosidase | β-glucanase | β-xylanase | Protein content | Amylose content            | Eating quality | Appearance | Hardness | Stickiness | Balance degree | Hardness HI | Stickiness s S1                       | Adhered mass L3                       | Adhesive mass A3 | Starch degree                         | Starch degree | Starch degree | Hardness ss H2 | Stickiness ss S2                      | Adhered mass L6                       | Adhesive mass A6 | Starch degree                         | Starch degree | Starch degree | Sample thickness | Tenderness | Pliability                            | Toughness | Brittleness                           | Days to heading |        |
|                |                                       |                                         |                                  | (U/g)     | (U/g)     | (U/g)         | (U/g)         | (U/g)           | (U/g)           | (U/g)       | (U/g)      | (%)             | (%)                        | (-)            | (-)        | (-)      | (-)        | (-)            | (-)         | (N/m <sup>2</sup> × 10 <sup>3</sup> ) | (N/m <sup>2</sup> × 10 <sup>3</sup> ) | (mm)             | (N/m <sup>2</sup> × 10 <sup>3</sup> ) | (-)           | (-)           | (-)            | (N/m <sup>2</sup> × 10 <sup>3</sup> ) | (N/m <sup>2</sup> × 10 <sup>3</sup> ) | (mm)             | (N/m <sup>2</sup> × 10 <sup>3</sup> ) | (-)           | (-)           | (-)              | (mm)       | (N/m <sup>2</sup> × 10 <sup>3</sup> ) | (-)       | (N/m <sup>2</sup> × 10 <sup>3</sup> ) | (-)             | (days) |
|                |                                       |                                         |                                  |           |           |               |               |                 |                 |             |            |                 |                            |                |            |          |            |                |             |                                       |                                       |                  |                                       |               |               |                |                                       |                                       |                  |                                       |               |               |                  |            |                                       |           |                                       |                 |        |
| Aichiasahi     | JRC52                                 | Landrace                                | -                                | 1         | 295.1     | 37.1          | 88.0          | 135.0           | 229.9           | 212.1       | 191.3      | 18.4            | 7.1                        | 16.1           | 65.0       | 5.7      | 6.9        | 6.2            | 5.8         | 98.5                                  | 27.7                                  | 0.86             | 0.91                                  | 0.28          | 1.48          | 0.39           | 24.3                                  | 0.53                                  | 1.91             | 24.0                                  | 0.23          | 0.91          | 0.19             | 2.35       | 52.4                                  | 1.00      | 78.4                                  | 2.77            | 115    |
| Aichinokori    | -                                     | Improved                                | 1987                             | 5         | 315.7     | 55.3          | 117.1         | 161.7           | 273.0           | 234.0       | 211.3      | 26.1            | 7.2                        | 15.4           | 67.0       | 6.0      | 6.7        | 6.3            | 6.1         | 91.7                                  | 19.6                                  | 0.74             | 0.61                                  | 0.22          | 1.37          | 0.23           | 22.6                                  | 0.19                                  | 0.63             | 0.17                                  | 2.19          | 63.4          | 1.09             | 90.5       | 2.32                                  | 117       |                                       |                 |        |
| Aikoku         | JRC26                                 | Landrace                                | -                                | 1         | 322.2     | 44.9          | 98.4          | 216.5           | 293.9           | 250.7       | 214.3      | 34.9            | 7.9                        | 13.9           | 73.0       | 7.1      | 6.1        | 6.9            | 7.1         | 84.7                                  | 17.8                                  | 0.77             | 0.62                                  | 0.21          | 1.32          | 0.29           | 22.6                                  | 0.55                                  | 1.45             | 22.1                                  | 0.26          | 0.68          | 0.20             | 2.38       | 44.3                                  | 1.05      | 64.5                                  | 2.36            | 99     |
| Akanoe         | JRC17                                 | Landrace                                | -                                | 1         | 127.6     | 20.6          | 40.3          | 204.6           | 204.6           | 114.5       | 127.0      | 14.3            | -                          | -              | 53.0       | 4.4      | 7.2        | 3.1            | 3.9         | 83.1                                  | 10.8                                  | 0.61             | 0.29                                  | 0.13          | 1.04          | 0.14           | 18.6                                  | 0.41                                  | 1.22             | 15.3                                  | 0.23          | 0.57          | 0.16             | 2.44       | 14.3                                  | 0.63      | 18.3                                  | 5.93            | 70     |
| Akanezora      | -                                     | Improved                                | 1991                             | 5         | 355.7     | 86.6          | 145.1         | 161.7           | 352.3           | 333.6       | 199.1      | 23.8            | 7.0                        | 15.5           | 87.3       | 9.3      | 4.8        | 8.9            | 9.2         | 35.3                                  | 10.2                                  | 2.38             | 0.94                                  | 0.29          | 0.74          | 1.21           | 13.0                                  | 0.40                                  | 3.43             | 16.8                                  | 0.31          | 1.89          | 0.32             | 20.3       | 11.2                                  | 0.63      | 5.5                                   | 4.45            | 122    |
| Akibare        | -                                     | Improved                                | 1953                             | 3         | 165.1     | 15.9          | 51.8          | 115.3           | 150.4           | 114.1       | 143.1      | 8.1             | 6.7                        | 15.2           | 65.7       | 5.8      | 6.9        | 6.2            | 5.9         | 96.2                                  | 18.2                                  | 0.66             | 0.55                                  | 0.19          | 1.25          | 0.25           | 24.0                                  | 0.44                                  | 1.31             | 22.9                                  | 0.19          | 0.68          | 0.19             | 2.15       | 65.1                                  | 1.06      | 92.6                                  | 2.69            | 115    |
| Akikhari       | -                                     | Improved                                | 1962                             | 4         | 212.3     | 19.5          | 63.3          | 139.1           | 221.5           | 131.5       | 141.0      | 12.6            | -                          | -              | 51.0       | 3.5      | 8.0        | 4.0            | 3.6         | 86.8                                  | 23.7                                  | 0.79             | 0.75                                  | 0.27          | 1.54          | 0.38           | 17.2                                  | 0.35                                  | 1.43             | 18.9                                  | 0.21          | 0.77          | 0.21             | 2.08       | 57.8                                  | 1.03      | 83.4                                  | 2.59            | 58     |
| Akikoma        | -                                     | Improved                                | 1976                             | 4         | 373.0     | 72.4          | 141.8         | 339.8           | 389.9           | 306.5       | 242.7      | 46.5            | 8.0                        | 13.6           | -          | -        | -          | -              | -           | -                                     | -                                     | -                | -                                     | -             | -             | -              | -                                     | -                                     | -                | -                                     | -             | -             | -                | -          | -                                     | -         | -                                     | 70              |        |
| Akiko          | -                                     | Improved                                | 1996                             | 5         | 130.1     | 23.9          | 32.2          | 134.2           | 189.3           | 66.1        | 119.1      | 13.2            | 8.2                        | 16.4           | 66.3       | 6.2      | 6.5        | 5.7            | 6.0         | 63.2                                  | 13.0                                  | 0.75             | 0.41                                  | 0.21          | 1.48          | 0.33           | 16.9                                  | 0.33                                  | 1.92             | 19.3                                  | 0.20          | 1.04          | 0.24             | 2.06       | 11.8                                  | 0.60      | 11.8                                  | 5.76            | 91     |
| Akikomachi     | -                                     | Improved                                | 1984                             | 5         | 295.5     | 35.6          | 78.7          | 196.8           | 209.4           | 190.7       | 176.2      | 22.2            | 6.9                        | 14.0           | 69.3       | 6.5      | 6.5        | 6.5            | 88.7        | 21.4                                  | 0.89                                  | 0.80             | 0.24                                  | 1.62          | 0.38          | 20.2           | 0.53                                  | 1.56                                  | 25.2             | 0.27                                  | 0.78          | 0.25          | 2.22             | 48.3       | 1.00                                  | 68.8      | 2.89                                  | 100             |        |
| Aoinokaze      | -                                     | Improved                                | 1989                             | 5         | 287.4     | 56.2          | 111.2         | 156.6           | 239.7           | 221.0       | 188.5      | 26.0            | 7.1                        | 15.5           | 75.7       | 7.4      | 6.0        | 7.7            | 7.6         | 82.5                                  | 22.7                                  | 0.95             | 0.87                                  | 0.28          | 1.73          | 0.46           | 23.1                                  | 0.50                                  | 1.70             | 23.3                                  | 0.22          | 0.86          | 0.21             | 2.21       | 68.0                                  | 1.15      | 92.9                                  | 1.99            | 119    |
| Asahi          | -                                     | Landrace                                | -                                | 1         | 366.3     | 62.2          | 97.4          | 214.8           | 300.7           | 181.6       | 193.0      | 35.5            | 7.4                        | 14.8           | 63.0       | 6.0      | 6.5        | 4.7            | 5.5         | 118.5                                 | 20.6                                  | 0.94             | 0.85                                  | 0.17          | 1.32          | 0.25           | 31.0                                  | 0.56                                  | 1.95             | 31.3                                  | 0.18          | 0.76          | 0.16             | 2.87       | 60.5                                  | 1.14      | 101.7                                 | 1.67            | 99     |
| Asahioyume     | -                                     | Improved                                | 1999                             | 5         | 193.7     | 20.8          | 49.6          | 136.7           | 161.6           | 134.9       | 140.9      | 15.9            | 7.1                        | 16.3           | 64.0       | 5.6      | 6.8        | 5.7            | 5.7         | 82.0                                  | 21.0                                  | 0.83             | 0.74                                  | 0.26          | 1.55          | 0.39           | 21.7                                  | 0.42                                  | 1.82             | 22.1                                  | 0.20          | 0.93          | 0.21             | 2.18       | 56.4                                  | 1.04      | 79.9                                  | 2.58            | 94     |
| Asanohiko      | -                                     | Improved                                | 1987                             | 5         | 299.3     | 75.9          | 77.2          | 291.6           | 313.4           | 174.4       | 171.0      | 22.9            | 7.2                        | 16.4           | 77.3       | 8.2      | 5.6        | 7.1            | 7.8         | 56.2                                  | 13.7                                  | 1.74             | 0.96                                  | 0.24          | 3.19          | 0.72           | 15.9                                  | 0.52                                  | 3.65             | 24.1                                  | 0.33          | 1.84          | 0.33             | 2.23       | 26.7                                  | 0.89      | 30.3                                  | 3.28            | 86     |
| Benisengoku    | -                                     | Improved                                | 1953                             | 3         | 369.3     | 67.2          | 114.4         | 177.3           | 285.0           | 227.5       | 214.0      | 36.6            | 6.5                        | 15.1           | 58.3       | 4.9      | 7.0        | 4.5            | 4.8         | 67.9                                  | 10.2                                  | 0.52             | 0.24                                  | 0.15          | 0.93          | 0.15           | 21.1                                  | 0.38                                  | 1.59             | 14.1                                  | 0.19          | 0.78          | 0.14             | 2.28       | 63.4                                  | 1.11      | 85.9                                  | 2.28            | 122    |
| Bozu           | -                                     | Landrace                                | -                                | 1         | 153.5     | 15.1          | 34.9          | 133.3           | 230.9           | 194.1       | 133.3      | 14.3            | 13.6                       | -              | -          | -        | -          | -              | -           | -                                     | -                                     | -                | -                                     | -             | -             | -              | -                                     | -                                     | -                | -                                     | -             | -             | -                | -          | -                                     | -         | -                                     | 91              |        |
| Chiyonohani    | -                                     | Improved                                | 1987                             | 5         | 193.5     | 34.4          | 44.6          | 195.4           | 234.6           | 194.1       | 179.3      | 27.1            | 6.5                        | 14.0           | 70.3       | 6.7      | 6.3        | 6.9            | 6.9         | 89.7                                  | 23.3                                  | 0.87             | 0.91                                  | 0.26          | 1.75          | 0.46           | 22.3                                  | 0.43                                  | 1.44             | 21.7                                  | 0.20          | 0.80          | 0.20             | 2.04       | 30.4                                  | 0.79      | 37.2                                  | 4.43            | 103    |
| Chiyonishiki   | -                                     | Improved                                | 1985                             | 5         | 283.0     | 47.8          | 75.5          | 185.4           | 273.2           | 181.9       | 166.3      | 27.0            | 6.8                        | 13.0           | 70.3       | 6.9      | 5.9        | 5.9            | 6.7         | 75.8                                  | 18.1                                  | 0.77             | 0.64                                  | 0.24          | 1.47          | 0.39           | 23.7                                  | 0.42                                  | 1.74             | 21.5                                  | 0.18          | 0.92          | 0.20             | 2.12       | 29.6                                  | 0.75      | 35.2                                  | 4.64            | 91     |
| Chujo 2        | -                                     | Improved                                | 1949                             | 3         | 251.2     | 36.5          | 63.9          | 131.9           | 234.6           | 158.9       | 151.1      | 14.5            | 7.1                        | 15.7           | 69.3       | 6.4      | 6.5        | 6.5            | 85.8        | 23.1                                  | 0.90                                  | 0.82             | 0.27                                  | 1.67          | 0.41          | 23.7           | 0.48                                  | 1.58                                  | 23.9             | 0.20                                  | 0.82          | 0.21          | 2.16             | 63.5       | 1.14                                  | 85.6      | 1.95                                  | 114             |        |
| Chuikyouasahi  | -                                     | Improved                                | 1943                             | 3         | 326.0     | 40.9          | 112.5         | 139.0           | 217.7           | 227.8       | 203.5      | 25.0            | 6.9                        | 16.2           | 77.7       | 7.8      | 5.8        | 7.7            | 7.9         | 75.3                                  | 22.7                                  | 0.79             | 0.78                                  | 0.30          | 1.46          | 0.44           | 22.4                                  | 0.49                                  | 1.69             | 25.9                                  | 0.23          | 0.86          | 0.24             | 2.20       | 49.9                                  | 1.00      | 67.6                                  | 2.86            | 109    |
| Daichinokaze   | -                                     | Improved                                | 1999                             | 5         | 132.6     | 42.2          | 33.1          | 130.8           | 151.6           | 87.0        | 128.7      | 8.7             | 6.7                        | 16.4           | 62.3       | 5.3      | 7.0        | 5.5            | 5.4         | 86.0                                  | 26.0                                  | 1.01             | 1.06                                  | 0.31          | 1.93          | 0.53           | 21.9                                  | 0.48                                  | 1.35             | 23.2                                  | 0.22          | 0.71          | 0.21             | 2.12       | 33.9                                  | 0.84      | 47.8                                  | 3.80            | 110    |
| Dango          | JRC25                                 | Landrace                                | -                                | 1         | 197.9     | 21.0          | 59.1          | 108.5           | 232.3           | 140.5       | 172.7      | 11.3            | -                          | -              | 58.7       | 4.8      | 7.2        | 4.9            | 4.8         | 70.2                                  | 15.3                                  | 0.70             | 0.47                                  | 0.22          | 1.27          | 0.29           | 17.1                                  | 0.45                                  | 1.03             | 16.3                                  | 0.27          | 0.51          | 0.19             | 2.24       | 29.8                                  | 0.81      | 38.9                                  | 4.38            | 116    |
| Densumaka      | -                                     | Improved                                | 1992                             | 5         | 315.8     | 44.1          | 81.6          | 198.8           | 237.4           | 151.9       | 179.3      | 27.1            | 6.5                        | 14.0           | 70.3       | 6.7      | 6.2        | 6.5            | 6.7         | 73.4                                  | 16.1                                  | 0.84             | 0.61                                  | 0.22          | 1.46          | 0.33           | 22.3                                  | 0.43                                  | 2.00             | 19.7                                  | 0.20          | 0.96          | 0.18             | 2.34       | 56.0                                  | 1.02      | 73.3                                  | 2.94            | 93     |
| Dontokoi       | -                                     | Improved                                | 1995                             | 5         | 159.2     | 19.2          | 33.8          | 106.9           | 155.1           | 98.9        | 128.1      | 11.4            | 7.0                        | 15.4           | 79.7       | 8.1      | 5.7        | 8.1            | 8.2         | 74.4                                  | 28.5                                  | 1.07             | 1.17                                  | 0.39          | 2.04          | 0.70           | 21.1                                  | 0.45                                  | 2.36             | 27.4                                  | 0.22          | 1.24          | 0.28             | 2.14       | 48.3                                  | 0.98      | 65.6                                  | 3.07            | 95     |
| Eiko           | -                                     | Improved                                | 1942                             | 3         | 245.4     | 31.9          | 60.8          | 184.7           | 292.4           | 135.5       | 158.0      | 21.6            | 9.1                        | 14.3           | -          | -        | -          | -              | -           | -                                     | -                                     | -                | -                                     | -             | -             | -              | -                                     | -                                     | -                | -                                     | -             | -             | -                | -          | -                                     | -         | -                                     | 74              |        |
| Fujibakari     | -                                     | Improved                                | 1977                             | 4         | 240.5     | 35.6          | 54.7          | 144.5           | 195.0           | 142.6       | 161.7      | 20.5            | 8.9                        | 14.7           | 73.3       | 7.3      | 5.9        | 6.9            | 7.2         | 91.0                                  | 31.3                                  | 1.08             | 1.37                                  | 0.36          | 2.12          | 0.71           | 24.1                                  | 0.45                                  | 2.10             | 25.3                                  | 0.19          | 1.13          | 0.22             | 2.08       | 24.3                                  | 0.73      | 31.3                                  | 4.73            | 95     |
| Fujimori       | -                                     | Improved                                | 1960                             | 4         | 175.8     | 20.2          | 38.6          | 103.9           | 145.9           | 88.4        | 122.0      | 10.4            | 7.1                        | 13.2           | 76.0       | 7.5      | 6.0        | 7.6            | 7.6         | 75.5                                  | 26.8                                  | 1.03             | 1.18                                  | 0.35          | 2.00          | 0.72           | 22.7                                  | 0.43                                  | 2.38             | 26.6                                  | 0.20          | 1.27          | 0.26             | 2.09       | 45.9                                  | 1.01      | 64.1                                  | 2.62            | 100    |
| Fujisaka 5     | -                                     | Improved                                | 1949                             | 3         | 259.0     | 37.1          | 81.4          | 273.8           | 224.6           | 185.2       | 185.5      | 28.8            | 7.4                        | 12.2           | 48.0       | 3.5      | 7.7        | 2.6            | 3.0         | 90.8                                  | 10.6                                  | 0.56             | 0.30                                  | 0.12          | 0.98          | 0.13           | 24.0                                  | 0.47                                  | 0.92             | 16.3                                  | 0.20          | 0.45          | 0.13             | 2.33       | 14.0                                  | 0.59      | 16.4                                  | 6.19            | 72     |
| Fukei 175      | -                                     | Improved                                | 1993                             | 5         | 206.6     | 19.4          | 58.4          | 144.8           | 175.9           | 139.0       | 153.1      | 10.9            | 7.5                        | 12.2           | 48.7       | 3.1      | 8.2        | 3.8            | 3.2         | 120.0                                 | 27.8                                  | 0.81             | 0.94                                  | 0.32          | 1.52          | 0.33           | 25.1                                  | 0.51                                  | 1.28             | 24.4                                  | 0.21          | 0.66          | 0.18             | 2.17       | 59.2                                  | 1.03      | 93.5                                  | 4.27            | 83     |
| Fukuhiki       | JRC46                                 | Landrace                                | -                                | 1         | 214.3     | 76.7          | 47.0          | 234.0           | 174.1           | 180.1       | 112.0      | 22.6            | -                          | -              | -          | -        | -          | -              | -           | -                                     | -                                     | -                | -                                     |               |               |                |                                       |                                       |                  |                                       |               |               |                  |            |                                       |           |                                       |                 |        |

|                  |          |      |   |       |      |       |       |       |       |       |      |     |      |      |     |     |     |      |       |      |      |      |      |      |      |      |      |      |      |      |      |      |      |      |       |       |      |     |
|------------------|----------|------|---|-------|------|-------|-------|-------|-------|-------|------|-----|------|------|-----|-----|-----|------|-------|------|------|------|------|------|------|------|------|------|------|------|------|------|------|------|-------|-------|------|-----|
| Manamsume        | Improved | 1997 | 5 | 304.3 | 51.9 | 92.0  | 188.3 | 272.2 | 200.2 | 168.0 | 31.3 | 7.1 | 14.1 | 69.3 | 6.5 | 6.3 | 6.4 | 6.6  | 72.4  | 17.5 | 0.82 | 0.68 | 0.24 | 1.48 | 0.39 | 21.7 | 0.46 | 1.87 | 20.9 | 0.21 | 0.93 | 0.20 | 2.26 | 37.7 | 0.88  | 45.7  | 3.98 | 88  |
| Matsuribare      | Improved | 1994 | 5 | 159.5 | 20.4 | 38.2  | 140.9 | 128.2 | 104.1 | 132.8 | 9.4  | 6.5 | 15.7 | 71.0 | 6.7 | 6.4 | 6.9 | 6.8  | 82.1  | 19.7 | 0.79 | 0.70 | 0.24 | 1.49 | 0.37 | 22.5 | 0.47 | 1.61 | 22.0 | 0.21 | 0.84 | 0.20 | 2.17 | 55.8 | 1.06  | 78.6  | 2.24 | 97  |
| Menkoïna         | Improved | 1999 | 5 | 256.1 | 39.8 | 78.1  | 186.7 | 237.0 | 178.6 | 168.7 | 27.8 | 7.4 | 13.9 | 63.3 | 5.7 | 6.6 | 5.2 | 5.6  | 57.1  | 15.7 | 0.94 | 0.64 | 0.28 | 1.47 | 0.53 | 20.1 | 0.40 | 2.02 | 20.4 | 0.20 | 1.03 | 0.22 | 2.20 | 9.9  | 0.59  | 9.3   | 5.99 | 88  |
| Mineasahi        | Improved | 1980 | 5 | 183.0 | 19.7 | 45.0  | 82.9  | 165.7 | 140.5 | 129.4 | 10.1 | 6.6 | 13.6 | 56.0 | 4.2 | 7.7 | 4.9 | 4.4  | 98.0  | 22.1 | 0.76 | 0.68 | 0.22 | 1.41 | 0.29 | 21.7 | 0.55 | 1.06 | 20.0 | 0.26 | 0.54 | 0.18 | 2.19 | 39.8 | 0.84  | 59.4  | 3.95 | 87  |
| Mirenschiki      | Improved | 1980 | 6 | 255.2 | 43.4 | 61.8  | 236.3 | 197.5 | 181.9 | 167.8 | 19.1 | 7.8 | 15.4 | 76.0 | 7.5 | 6.0 | 7.5 | 7.5  | 74.6  | 18.1 | 0.89 | 0.69 | 0.24 | 1.62 | 0.27 | 17.7 | 0.49 | 1.50 | 22.5 | 0.29 | 0.75 | 0.26 | 2.24 | 51.5 | 1.10  | 73.7  | 1.91 | 116 |
| Moritawase       | Improved | 1913 | 2 | 152.4 | 12.1 | 35.6  | 153.8 | 220.9 | 112.2 | 133.6 | 16.2 | 8.0 | 14.1 | 58.0 | 4.9 | 7.1 | 4.5 | 4.7  | 99.9  | 19.9 | 0.68 | 0.62 | 0.21 | 1.25 | 0.27 | 23.3 | 0.50 | 1.11 | 18.6 | 0.22 | 0.57 | 0.16 | 2.19 | 6.2  | 0.54  | 4.9   | 6.41 | 88  |
| Mutsumohare      | Improved | 1985 | 5 | 276.3 | 42.0 | 73.1  | 190.5 | 226.0 | 167.2 | 160.4 | 23.9 | 7.3 | 12.8 | 65.3 | 6.0 | 6.5 | 5.4 | 5.8  | 76.0  | 19.3 | 0.86 | 0.73 | 0.26 | 1.62 | 0.43 | 23.2 | 0.45 | 2.04 | 24.6 | 0.20 | 1.04 | 0.22 | 2.20 | 28.8 | 0.81  | 38.0  | 4.16 | 93  |
| Nagoyashiro      | Landrace | -    | 1 | 178.5 | 18.2 | 47.7  | 158.3 | 222.3 | 144.5 | 303.9 | 19.1 | 6.5 | 13.7 | 64.7 | 5.9 | 6.6 | 5.6 | 5.8  | 56.1  | 12.0 | 0.73 | 0.40 | 0.21 | 1.25 | 0.28 | 15.5 | 0.33 | 1.78 | 15.7 | 0.22 | 0.84 | 0.20 | 2.38 | 23.7 | 0.77  | 30.0  | 4.71 | 96  |
| Nagoyutaka       | Improved | 1979 | 4 | 187.0 | 22.9 | 59.8  | 125.4 | 181.5 | 107.3 | 153.5 | 18.2 | 7.0 | 14.8 | 64.0 | 5.7 | 6.6 | 5.3 | 5.6  | 83.0  | 16.0 | 0.65 | 0.49 | 0.19 | 1.23 | 0.24 | 21.8 | 0.43 | 1.30 | 20.6 | 0.20 | 0.67 | 0.19 | 2.15 | 38.6 | 0.87  | 51.4  | 3.96 | 115 |
| Nakateshinsenbon | Improved | 1950 | 3 | 82.9  | 23.9 | 33.5  | 138.6 | 213.1 | 94.9  | 125.0 | 11.7 | 6.8 | 15.6 | 64.0 | 5.8 | 6.7 | 5.4 | 5.6  | 86.3  | 20.8 | 0.71 | 0.68 | 0.24 | 1.41 | 0.35 | 24.2 | 0.47 | 1.57 | 21.8 | 0.20 | 0.87 | 0.19 | 2.05 | 25.6 | 0.71  | 33.8  | 4.77 | 89  |
| Natsushoshi      | Improved | 2001 | 6 | 198.4 | 21.5 | 54.5  | 126.5 | 146.7 | 119.0 | 124.9 | 11.5 | 7.8 | 16.0 | 54.3 | 1.3 | 2.6 | 1.6 | 1.4  | 98.8  | 18.2 | 0.78 | 0.58 | 0.18 | 1.35 | 0.23 | 19.1 | 0.60 | 1.32 | 24.1 | 0.32 | 0.63 | 0.24 | 2.36 | 52.9 | 0.99  | 87.1  | 3.96 | 72  |
| Natsuhikari      | Improved | 1983 | 5 | 231.7 | 30.4 | 62.3  | 144.7 | 212.3 | 157.8 | 154.1 | 17.3 | 7.6 | 14.3 | 69.7 | 6.5 | 6.5 | 6.6 | 6.5  | 91.1  | 21.7 | 0.74 | 0.71 | 0.24 | 1.31 | 0.34 | 25.1 | 0.46 | 1.80 | 22.8 | 0.19 | 0.87 | 0.17 | 2.30 | 75.3 | 1.20  | 106.0 | 1.69 | 105 |
| Nihonmasari      | Improved | 1973 | 4 | 319.2 | 44.4 | 99.3  | 180.8 | 240.0 | 158.3 | 196.8 | 18.2 | 7.5 | 15.6 | 70.0 | 6.6 | 6.4 | 6.4 | 6.6  | 86.8  | 17.9 | 0.82 | 0.57 | 0.21 | 1.46 | 0.29 | 25.2 | 0.48 | 1.37 | 19.4 | 0.19 | 0.68 | 0.15 | 2.25 | 65.7 | 1.11  | 92.4  | 2.27 | 123 |
| Nikomaru         | Improved | 2005 | 6 | 358.0 | 75.7 | 115.6 | 219.4 | 281.0 | 250.9 | 206.8 | 39.3 | 7.2 | 16.4 | 69.3 | 6.6 | 6.3 | 6.2 | 6.5  | 80.3  | 17.0 | 0.75 | 0.58 | 0.22 | 1.27 | 0.30 | 23.3 | 0.42 | 1.90 | 20.7 | 0.18 | 0.89 | 0.17 | 2.37 | 67.4 | 1.17  | 98.5  | 1.72 | 120 |
| Nippombare       | Improved | 1963 | 4 | 185.7 | 17.7 | 45.7  | 144.7 | 146.5 | 136.8 | 152.7 | 12.4 | 7.5 | 16.1 | 67.3 | 6.1 | 6.7 | 6.4 | 6.2  | 78.7  | 20.7 | 0.95 | 0.75 | 0.27 | 1.23 | 0.43 | 21.8 | 0.50 | 1.39 | 22.4 | 0.24 | 0.69 | 0.21 | 2.25 | 52.4 | 1.04  | 75.6  | 2.34 | 109 |
| Nishihomare      | Improved | 1979 | 4 | 275.9 | 38.3 | 75.7  | 139.1 | 175.5 | 165.3 | 175.4 | 16.1 | 7.2 | 15.4 | 68.0 | 6.2 | 6.7 | 6.5 | 6.3  | 84.9  | 20.3 | 0.72 | 0.60 | 0.24 | 1.34 | 0.32 | 24.9 | 0.49 | 1.24 | 21.4 | 0.20 | 0.65 | 0.17 | 2.16 | 34.4 | 0.79  | 43.4  | 4.49 | 118 |
| Norin 1          | Improved | 1931 | 2 | 171.5 | 27.7 | 40.2  | 101.2 | 176.2 | 111.9 | 135.3 | 10.6 | 7.8 | 14.6 | 82.7 | 8.4 | 5.6 | 8.6 | 8.5  | 88.1  | 24.6 | 0.88 | 0.93 | 0.28 | 1.68 | 0.45 | 20.9 | 0.47 | 1.66 | 23.1 | 0.23 | 0.87 | 0.23 | 2.12 | 40.0 | 0.98  | 56.0  | 2.80 | 102 |
| Norin 18         | Improved | 1941 | 3 | 276.5 | 43.2 | 73.6  | 215.1 | 288.0 | 199.5 | 173.2 | 24.8 | 8.0 | 14.8 | 61.3 | 5.5 | 6.8 | 4.9 | 5.2  | 96.1  | 18.3 | 0.81 | 0.65 | 0.20 | 1.33 | 0.26 | 24.1 | 0.55 | 1.62 | 23.6 | 0.23 | 0.73 | 0.18 | 2.45 | 34.3 | 0.93  | 55.2  | 3.10 | 60  |
| Norin 22         | Improved | 1943 | 3 | 179.0 | 23.0 | 49.3  | 167.7 | 282.1 | 174.4 | 160.2 | 17.3 | -   | -    | 65.3 | 5.9 | 6.6 | 5.7 | 5.9  | 76.7  | 19.6 | 0.81 | 0.70 | 0.26 | 1.57 | 0.40 | 18.3 | 0.44 | 1.71 | 20.0 | 0.24 | 0.92 | 0.24 | 2.10 | 32.5 | 0.76  | 30.0  | 4.35 | 89  |
| Norin 29         | Improved | 1945 | 3 | 237.5 | 23.2 | 63.6  | 129.4 | 214.8 | 153.6 | 155.1 | 15.3 | 8.1 | 13.8 | 69.7 | 6.4 | 6.6 | 6.8 | 6.5  | 90.6  | 27.1 | 0.89 | 1.04 | 0.29 | 1.73 | 0.49 | 22.0 | 0.55 | 1.45 | 23.5 | 0.25 | 0.77 | 0.22 | 2.10 | 32.8 | 0.79  | 47.0  | 4.17 | 111 |
| Norin 6          | Improved | 1936 | 2 | 222.1 | 15.5 | 60.5  | 144.0 | 208.6 | 166.2 | 170.0 | 12.2 | 9.2 | 15.7 | 66.3 | 5.8 | 6.9 | 6.4 | 6.0  | 81.2  | 19.1 | 0.69 | 0.54 | 0.24 | 1.31 | 0.29 | 21.6 | 0.47 | 1.11 | 20.8 | 0.22 | 0.57 | 0.20 | 2.16 | 18.8 | 0.66  | 24.1  | 5.10 | 109 |
| Norin 8          | Improved | 1937 | 2 | 287.5 | 47.9 | 94.3  | 133.6 | 236.4 | 183.0 | 172.1 | 24.4 | -   | -    | 78.7 | 7.8 | 5.9 | 8.1 | 8.0  | 89.8  | 22.8 | 0.84 | 0.83 | 0.26 | 1.48 | 0.39 | 24.9 | 0.54 | 1.77 | 28.2 | 0.22 | 0.86 | 0.22 | 2.29 | 71.9 | 1.16  | 107.5 | 1.62 | 114 |
| Notohikari       | Improved | 1985 | 5 | 216.0 | 27.1 | 61.6  | 192.8 | 219.1 | 153.5 | 206.7 | 19.9 | 7.0 | 13.4 | 57.7 | 4.8 | 7.2 | 4.6 | 4.6  | 87.5  | 19.8 | 0.72 | 0.64 | 0.22 | 1.29 | 0.30 | 22.4 | 0.51 | 1.58 | 24.5 | 0.23 | 0.76 | 0.21 | 2.29 | 40.4 | 0.93  | 56.2  | 3.32 | 81  |
| Okizuri          | Improved | 1996 | 5 | 63.2  | 14.3 | 23.1  | 97.7  | 150.1 | 59.3  | 115.4 | 8.2  | 6.7 | 13.1 | 64.0 | 5.8 | 6.8 | 5.6 | 5.7  | 68.2  | 19.9 | 0.81 | 0.69 | 0.29 | 1.51 | 0.46 | 16.2 | 0.33 | 1.86 | 19.0 | 0.21 | 0.97 | 0.24 | 2.15 | 34.8 | 0.84  | 48.4  | 3.98 | 90  |
| Omachi           | Landrace | -    | 1 | 265.1 | 30.0 | 73.0  | 140.6 | -     | 167.0 | 149.8 | 13.5 | 6.9 | 14.1 | 63.0 | 5.4 | 7.1 | 5.8 | 5.5  | 89.7  | 21.0 | 0.70 | 0.72 | 0.24 | 1.23 | 0.35 | 24.4 | 0.50 | 1.76 | 21.9 | 0.21 | 0.86 | 0.17 | 2.31 | 31.7 | 0.82  | 48.7  | 4.08 | 122 |
| Oochikara        | Improved | 1989 | 5 | 236.6 | 39.0 | 49.4  | 183.3 | 302.4 | 150.0 | 155.8 | 19.5 | 8.2 | 13.9 | 61.0 | 5.8 | 6.5 | 4.0 | 5.2  | 105.7 | 25.3 | 0.97 | 0.99 | 0.24 | 1.82 | 0.42 | 26.0 | 0.48 | 3.91 | 25.2 | 0.19 | 2.04 | 0.19 | 2.17 | 32.9 | 0.76  | 47.4  | 4.43 | 91  |
| Ouu 197          | Improved | 1937 | 2 | 231.6 | 28.3 | 54.1  | 141.4 | 151.1 | 149.3 | 155.4 | 16.7 | 7.0 | 13.6 | 73.3 | 7.2 | 6.1 | 6.9 | 7.1  | 69.6  | 19.6 | 0.95 | 0.79 | 0.28 | 1.65 | 0.46 | 20.5 | 0.48 | 23.3 | 24.7 | 0.24 | 1.08 | 0.24 | 2.32 | 48.0 | 1.07  | 65.3  | 2.43 | 91  |
| Ouu 292          | Improved | 1974 | 4 | 179.3 | 26.1 | 41.0  | 139.4 | 200.8 | 118.6 | 130.4 | 11.5 | 8.0 | 14.8 | 76.0 | 7.4 | 6.1 | 7.7 | 7.5  | 56.2  | 16.7 | 0.84 | 0.61 | 0.30 | 1.53 | 0.47 | 15.2 | 0.34 | 2.12 | 21.5 | 0.22 | 1.08 | 0.29 | 2.20 | 48.2 | 0.99  | 66.4  | 2.95 | 93  |
| Raiden           | Landrace | -    | 1 | 275.9 | 34.2 | 81.5  | 132.5 | 183.0 | 155.1 | 167.3 | 17.0 | 8.0 | 15.5 | 71.3 | 6.7 | 6.5 | 7.2 | 6.8  | 91.0  | 18.5 | 0.81 | 0.64 | 0.21 | 1.42 | 0.31 | 25.3 | 0.55 | 1.39 | 23.4 | 0.22 | 0.68 | 0.18 | 2.30 | 46.5 | 0.99  | 68.1  | 2.86 | 123 |
| Reihou           | Improved | 1969 | 4 | 243.7 | 33.5 | 55.4  | 132.0 | 173.8 | 103.6 | 147.7 | 12.7 | 6.8 | 15.3 | 70.0 | 6.6 | 6.4 | 6.7 | 6.6  | 80.3  | 18.6 | 0.83 | 0.68 | 0.24 | 1.54 | 0.39 | 21.6 | 0.46 | 1.23 | 19.5 | 0.22 | 0.62 | 0.19 | 2.19 | 45.7 | 0.96  | 64.1  | 3.03 | 113 |
| Reimei           | Improved | 1962 | 4 | 291.1 | 35.8 | 106.9 | 121.7 | 230.3 | 185.6 | 16.9  | -    | -   | 67.0 | 6.0  | 6.7 | 6.3 | 6.1 | 93.0 | 22.8  | 0.72 | 0.77 | 0.25 | 1.34 | 0.35 | 24.6 | 0.52 | 1.45 | 23.3 | 0.21 | 0.74 | 0.19 | 2.20 | 71.4 | 1.12 | 106.7 | 1.94  | 115  |     |
| -                | Landrace | -    | 1 | 280.1 | 50.9 | 86.6  | 187.6 | -     | 305.1 | 215.8 | 14.6 | 7.7 | 13.6 | 70.3 | 7.0 | 6.1 | 6.1 | 6.7  | 69.8  | 16.5 | 0.79 | 0.56 | 0.24 | 1.49 | 0.35 | 16.6 | 0.42 | 1.71 | 19.4 | 0.26 | 0.88 | 0.24 | 2.17 | 10.8 | 0.61  | 11.3  | 5.63 | 93  |
| Rikuu 132        | Improved | 1921 | 2 | 233.9 | 23.4 | 63.0  | 157.0 | 204.9 | 156.0 | 159.9 | 13.5 | 7.7 | 13.2 | 70.3 | 6.5 | 6.6 | 7.0 | 6.6  | 83.1  | 20.3 | 0.82 | 0.71 | 0.25 | 1.47 | 0.38 | 23.8 | 0.45 | 1.61 | 23.1 | 0.19 | 0.80 | 0.19 | 2.25 | 59.5 | 0.99  | 85.2  | 3.12 | 109 |
| Rikuu 20         | Improved | 1915 | 2 | 330.1 | 60.8 | 106.2 | 224.3 | 269.6 | 249.2 | 202.8 | 37.5 | 7.6 | 13.1 | -    | -   | -   | -   | -    | 89.7  | 17.7 | 0.74 | 0.59 | 0.19 | 1.22 | 0.25 | 24.6 | 0.55 | 2.03 | 23.2 | 0.22 | 0.93 | 0.17 | 2.45 | 43.9 | 1.00  | 67.9  | 2.26 | 121 |
| Sachikaze        | Improved | 1960 | 4 | 123.1 | 12.1 | 39.6  | 116.7 | 141.7 | 69.8  | 128.4 | 7.9  | -   | -    | 67.0 | 6.1 | 6.7 | 6.3 | 6.1  | 95.0  | 26.1 | 0.85 | 0.95 | 0.28 | 1.58 | 0.42 | 24.2 | 0.51 | 1.40 | 25.0 | 0.21 | 0.72 | 0.21 | 2.18 | 49.3 | 0.93  | 74.3  | 3.19 | 110 |
| Sakhiikari       | Improved | 2003 | 6 | 224.5 | 39.8 | 47.6  | 154.5 | 190.4 | 149.6 | 148.6 | 17.8 | 6.9 | 15.4 | 75.7 | 7.6 | 5.7 | 7.0 | 7.5  | 76.0  | 24.1 | 0.89 | 0.93 | 0.32 | 1.77 | 0.55 | 17.2 | 0.33 | 2.   |      |      |      |      |      |      |       |       |      |     |
