# Supplementary material
Source: publisher figshare collection journal article supplement (https://tandf.figshare.com/articles/dataset/_/7370081)
Supplement: Supplementary file 2 [file 1]

*p*-nitrophenyl- $\alpha$ -maltoheptaoside

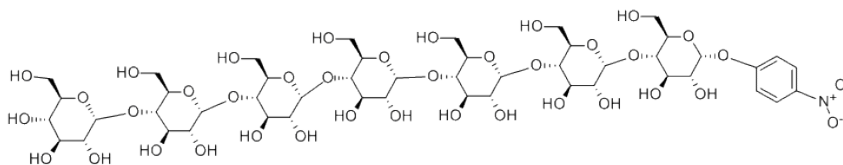

*p*-nitrophenyl- $\beta$ -maltotrioside

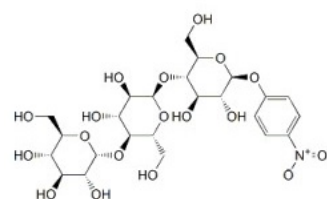

*p*-nitrophenyl- $\alpha$ -glucopyranoside

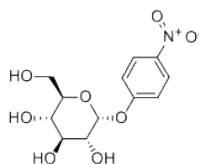

*p*-nitrophenyl- $\alpha$ -mannopyranoside

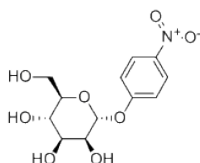

*p*-nitrophenyl- $\alpha$ -galactopyranoside

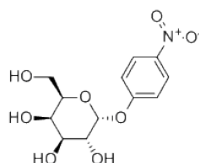

*o*-nitrophenyl- $\beta$ -galactopyranoside

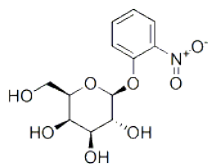

*p*-nitrophenyl- $\beta$ -glucopyranoside

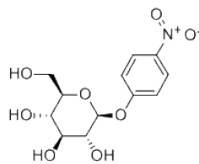

*p*-nitrophenyl- $\beta$ -xylopyranoside

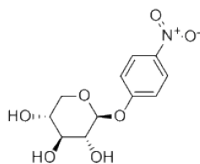

**Supplemental Figure 1.** Structural formulae of substrates of the eight endosperm enzymes used in this study.
