# Supplementary material
Source: publisher figshare collection journal article supplement (https://tandf.figshare.com/articles/dataset/_/7370081)
Supplement: Supplementary file 3 [file 1]

**Supplemental Table 4.** Eigenvectors and cumulative contributions for endosperm enzyme activities and eating-quality traits in the Principal component analysis.

|                                    | Principal components in 2012 |              |             |              |              |              | Principal components in 2014 |              |              |             |              |              |
|------------------------------------|------------------------------|--------------|-------------|--------------|--------------|--------------|------------------------------|--------------|--------------|-------------|--------------|--------------|
|                                    | PC1                          | PC2          | PC3         | PC4          | PC5          | PC6          | PC1                          | PC2          | PC3          | PC4         | PC5          | PC6          |
| Eigenvalue                         | 5.5                          | 2.4          | 1.7         | 1.5          | 0.9          | 0.8          | 5.9                          | 2.4          | 1.7          | 1.1         | 0.8          | 0.7          |
| Percentage contribution            | 36.5                         | 15.9         | 11.6        | 10.3         | 6.2          | 5.1          | 39.3                         | 16.1         | 11.4         | 7.4         | 5.5          | 4.6          |
| Cumulative contribution            | 36.5                         | 52.4         | 64.0        | 74.3         | 80.5         | 85.6         | 39.3                         | 55.4         | 66.8         | 74.2        | 79.7         | 84.3         |
| Trait                              |                              |              |             |              |              |              |                              |              |              |             |              |              |
| Endosperm enzyme activity          |                              |              |             |              |              |              |                              |              |              |             |              |              |
| $\alpha$ -amylase                  | <b>0.38</b>                  | 0.20         | 0.04        | 0.10         | 0.00         | -0.06        | <b>0.36</b>                  | 0.11         | <b>0.22</b>  | 0.05        | 0.03         | 0.00         |
| $\beta$ -amylase                   | <b>0.29</b>                  | 0.02         | -0.03       | 0.14         | <b>-0.62</b> | 0.13         | <b>0.36</b>                  | -0.04        | 0.19         | 0.05        | 0.01         | -0.01        |
| $\alpha$ -glucosidase              | <b>0.40</b>                  | 0.09         | 0.03        | -0.02        | -0.09        | 0.10         | <b>0.37</b>                  | 0.10         | 0.16         | 0.08        | -0.06        | -0.01        |
| $\alpha$ -mannosidase              | <b>0.27</b>                  | 0.10         | 0.05        | 0.03         | <b>0.60</b>  | <b>-0.38</b> | <b>0.30</b>                  | 0.04         | <b>-0.25</b> | -0.12       | <b>0.28</b>  | <b>-0.32</b> |
| $\alpha$ -galactosidase            | 0.17                         | -0.15        | 0.15        | <b>-0.46</b> | <b>0.28</b>  | <b>0.45</b>  | <b>0.31</b>                  | -0.01        | <b>-0.25</b> | -0.03       | 0.02         | 0.16         |
| $\beta$ -galactosidase             | <b>0.35</b>                  | <b>0.23</b>  | 0.03        | -0.08        | <b>0.20</b>  | 0.06         | <b>0.38</b>                  | 0.06         | 0.12         | 0.04        | 0.07         | -0.06        |
| $\beta$ -glucanase                 | <b>0.35</b>                  | 0.03         | 0.11        | 0.03         | -0.07        | -0.05        | <b>0.28</b>                  | 0.00         | -0.05        | -0.15       | <b>-0.34</b> | <b>0.45</b>  |
| $\beta$ -xylanase                  | <b>0.41</b>                  | 0.06         | 0.03        | 0.03         | -0.13        | 0.03         | <b>0.38</b>                  | 0.03         | 0.04         | -0.07       | -0.01        | 0.02         |
| Protein content                    | 0.12                         | <b>-0.56</b> | -0.07       | -0.10        | -0.06        | -0.18        | 0.04                         | 0.19         | <b>-0.36</b> | <b>0.45</b> | <b>0.59</b>  | <b>0.46</b>  |
| Amylose content                    | -0.03                        | 0.05         | <b>0.22</b> | <b>0.64</b>  | 0.07         | <b>-0.28</b> | -0.01                        | 0.04         | 0.15         | <b>0.85</b> | <b>-0.36</b> | -0.14        |
| Cooked Rice Taste Analyzer         |                              |              |             |              |              |              |                              |              |              |             |              |              |
| Eating-quality score               | -0.18                        | <b>0.53</b>  | 0.10        | 0.03         | -0.02        | <b>0.29</b>  | 0.03                         | <b>-0.29</b> | <b>0.58</b>  | 0.02        | <b>0.36</b>  | 0.07         |
| Tensipresser                       |                              |              |             |              |              |              |                              |              |              |             |              |              |
| Hardness of the grain surface H1   | 0.02                         | <b>-0.26</b> | <b>0.61</b> | 0.06         | 0.02         | 0.09         | -0.09                        | <b>0.57</b>  | 0.00         | -0.08       | -0.13        | 0.17         |
| Stickiness of the grain surface S1 | <b>-0.21</b>                 | 0.33         | <b>0.43</b> | -0.13        | -0.03        | 0.02         | <b>-0.21</b>                 | 0.19         | <b>0.49</b>  | -0.09       | <b>0.25</b>  | <b>0.33</b>  |
| Hardness of the whole grain H2     | 0.01                         | <b>-0.29</b> | <b>0.29</b> | <b>0.41</b>  | 0.15         | <b>0.46</b>  | -0.02                        | <b>0.52</b>  | 0.14         | -0.10       | -0.20        | 0.09         |
| Stickiness of the whole grain S2   | -0.03                        | -0.01        | <b>0.50</b> | <b>-0.38</b> | <b>-0.28</b> | <b>-0.44</b> | -0.02                        | <b>0.46</b>  | 0.06         | 0.00        | <b>0.26</b>  | <b>-0.54</b> |

Boldfaced values represent statistically significant loadings.
