# Supplementary material
Source: publisher figshare collection journal article supplement (https://tandf.figshare.com/articles/dataset/_/7370081)
Supplement: Supplementary file 4 [file 1]

Archive with 6 entries (6 files):
- tbbb_a_1547624_sm1238.pdf
- tbbb_a_1547624_sm1237.pdf
- tbbb_a_1547624_sm1236.pdf
- tbbb_a_1547624_sm1235.pdf
- tbbb_a_1547624_sm1234.pdf
- tbbb_a_1547624_sm1233.pdf
