# Supplementary material
Source: publisher figshare collection journal article supplement (https://tandf.figshare.com/articles/dataset/_/7370081)
Supplement: Supplementary file 4 [file 1 › tbbb_a_1547624_sm1233.pdf]

[illegible]

|                  |          |          |      |       |       |       |       |       |       |       |       |      |      |      |      |     |     |      |      |      |      |      |      |      |      |      |      |      |      |      |      |      |      |      |      |      |      |      |     |
|------------------|----------|----------|------|-------|-------|-------|-------|-------|-------|-------|-------|------|------|------|------|-----|-----|------|------|------|------|------|------|------|------|------|------|------|------|------|------|------|------|------|------|------|------|------|-----|
| Manamsume        | Improved | 1997     | 5    | 207.3 | 60.7  | 79.7  | 191.5 | 226.3 | 258.0 | 215.5 | 27.9  | 5.8  | 16.0 | 86.0 | 8.9  | 5.0 | 8.7 | 8.9  | 66.1 | 16.4 | 0.88 | 0.60 | 0.26 | 1.60 | 0.43 | 18.9 | 0.43 | 2.13 | 23.1 | 0.23 | 1.07 | 0.25 | 2.21 | 36.8 | 0.91 | 46.5 | 3.72 | 103  |     |
| Matsuribare      | Improved | 1994     | 5    | 239.5 | 49.0  | 89.6  | 443.3 | 292.1 | 308.0 | 188.1 | 32.7  | 5.1  | 17.2 | 85.3 | 8.8  | 5.1 | 8.6 | 8.8  | 75.8 | 13.4 | 0.77 | 0.48 | 0.18 | 1.36 | 0.27 | 22.8 | 0.48 | 1.21 | 21.5 | 0.21 | 0.59 | 0.19 | 2.32 | 48.4 | 1.07 | 68.1 | 2.38 | 120  |     |
| Menkoïna         | Improved | 1999     | 5    | 275.9 | 100.5 | 111.7 | 295.2 | 256.3 | 295.8 | 208.4 | 41.3  | 5.9  | 16.5 | 76.0 | 7.9  | 5.5 | 6.9 | 7.7  | 61.7 | 12.0 | 0.70 | 0.36 | 0.20 | 1.29 | 0.24 | 19.7 | 0.37 | 1.76 | 17.4 | 0.19 | 0.90 | 0.19 | 2.19 | 30.4 | 0.83 | 37.1 | 4.33 | 102  |     |
| Mineasahi        | Improved | 1980     | 5    | 247.6 | 78.0  | 100.1 | 280.0 | 86.4  | 232.3 | 178.5 | 37.9  | 5.3  | 16.8 | 83.3 | 8.6  | 5.1 | 8.2 | 8.6  | 64.7 | 14.7 | 0.87 | 0.52 | 0.23 | 1.57 | 0.24 | 22.7 | 0.44 | 1.95 | 19.5 | 0.20 | 0.96 | 0.18 | 2.27 | 31.1 | 0.86 | 35.7 | 3.97 | 105  |     |
| Mitsunishi       | Improved | 2000     | 6    | 156.5 | 39.8  | 58.5  | 225.1 | 98.7  | 126.2 | 150.3 | 24.1  | 6.0  | 17.7 | 77.3 | 7.7  | 5.8 | 7.5 | 7.7  | 72.3 | 17.6 | 0.76 | 0.44 | 0.25 | 1.30 | 0.26 | 21.4 | 0.50 | 1.42 | 22.2 | 0.24 | 0.67 | 0.21 | 2.37 | 52.7 | 1.16 | 73.1 | 1.66 | 115  |     |
| Moritawase       | JRC30    | Improved | 1913 | 2     | 176.4 | 68.7  | 73.7  | 244.2 | 256.7 | 205.5 | 156.8 | 26.0 | 7.4  | 17.2 | 60.7 | 5.3 | 6.9 | 4.8  | 5.1  | 94.1 | 12.9 | 0.60 | 0.36 | 0.13 | 1.05 | 0.15 | 24.6 | 0.49 | 1.02 | 18.4 | 0.21 | 0.48 | 0.14 | 2.35 | 40.1 | 0.90 | 54.9 | 3.74 | 91  |
| Mutsumohare      | Improved | 1985     | 5    | 318.5 | 120.8 | 158.6 | 305.7 | 330.1 | 292.3 | 262.4 | 63.5  | 5.8  | 17.0 | 76.0 | 7.6  | 5.7 | 7.2 | 7.6  | 80.8 | 13.6 | 0.65 | 0.42 | 0.17 | 1.14 | 0.20 | 17.9 | 0.41 | 1.03 | 14.8 | 0.20 | 0.50 | 0.16 | 2.28 | 39.5 | 0.95 | 57.8 | 2.95 | 91   |     |
| Nagoyashiro      | JRC38    | Landrace | -    | 1     | 215.8 | 50.5  | 88.3  | 275.7 | 316.4 | 213.6 | 269.1 | 36.4 | 6.6  | 16.2 | 65.7 | 6.6 | 5.9 | 4.4  | 5.9  | 69.4 | 6.6  | 0.59 | 0.15 | 0.10 | 1.04 | 0.10 | 19.6 | 0.39 | 0.87 | 12.5 | 0.20 | 0.42 | 0.13 | 2.29 | 29.1 | 0.80 | 38.7 | 4.29 | 107 |
| Nagoyutaka       | Improved | 1979     | 4    | 245.2 | 80.9  | 95.1  | 266.4 | 102.0 | 239.0 | 177.8 | 32.3  | 5.7  | 16.6 | 75.7 | 7.6  | 5.9 | 7.4 | 7.6  | 64.2 | 11.0 | 0.79 | 0.37 | 0.17 | 1.39 | 0.25 | 23.3 | 0.47 | 1.34 | 17.5 | 0.21 | 0.66 | 0.16 | 2.29 | 14.0 | 0.65 | 13.9 | 5.40 | -    |     |
| Nakateshinsenbon | Improved | 1950     | 3    | 249.9 | 81.9  | 98.1  | 290.9 | 102.9 | 255.5 | 199.8 | 38.5  | 5.7  | 16.6 | 80.7 | 8.3  | 5.4 | 7.9 | 8.3  | 77.5 | 14.7 | 0.76 | 0.47 | 0.19 | 1.35 | 0.26 | 21.9 | 0.46 | 1.21 | 18.1 | 0.21 | 0.59 | 0.17 | 2.27 | 37.8 | 0.92 | 50.1 | 1.80 | 120  |     |
| Nakatsushiki     | Improved | 2001     | 6    | 266.1 | 73.3  | 119.4 | 320.1 | 297.9 | 291.0 | 158.8 | 46.0  | 6.0  | 14.4 | 78.5 | 8.1  | 5.4 | 7.4 | 8.0  | 67.5 | 13.1 | 0.80 | 0.44 | 0.19 | 1.34 | 0.26 | 19.2 | 0.50 | 1.47 | 23.0 | 0.29 | 0.69 | 0.25 | 2.38 | 40.2 | 1.08 | 54.5 | 2.06 | 79   |     |
| Natshikari       | Improved | 1983     | 5    | 234.3 | 100.2 | 95.4  | 218.0 | 91.2  | 263.8 | 172.0 | 34.2  | 6.1  | 16.3 | 72.0 | 7.1  | 5.9 | 6.3 | 6.9  | 79.2 | 18.3 | 0.87 | 0.60 | 0.23 | 1.60 | 0.32 | 22.4 | 0.52 | 1.51 | 21.6 | 0.23 | 0.77 | 0.20 | 2.20 | 47.3 | 1.00 | 67.1 | 2.72 | 90   |     |
| Nishimatsuri     | Improved | 1973     | 4    | 243.4 | 100.6 | 90.9  | 234.0 | 89.1  | 219.9 | 152.3 | 35.5  | 5.5  | 19.7 | 75.3 | 7.3  | 6.0 | 7.4 | 7.4  | 87.3 | 15.5 | 0.67 | 0.47 | 0.18 | 1.14 | 0.22 | 26.4 | 0.37 | 1.95 | 19.7 | 0.15 | 0.91 | 0.14 | 2.38 | 64.7 | 1.19 | 92.1 | 1.83 | 115  |     |
| Nikomaru         | Improved | 2005     | 6    | 248.7 | 35.0  | 87.3  | 314.5 | 338.2 | 277.3 | 207.8 | 26.1  | 5.0  | 16.7 | 87.0 | 9.1  | 4.9 | 8.9 | 9.1  | 67.6 | 17.4 | 1.00 | 0.71 | 0.25 | 1.76 | 0.42 | 21.4 | 0.47 | 1.68 | 25.0 | 0.22 | 0.82 | 0.24 | 2.30 | 41.0 | 1.00 | 53.7 | 2.72 | -    |     |
| Nippombare       | Improved | 1963     | 4    | 217.5 | 31.7  | 75.0  | 297.2 | 262.5 | 225.9 | 175.5 | 23.8  | 6.1  | 17.6 | 74.4 | 7.4  | 5.9 | 7.1 | 7.3  | 70.7 | 13.4 | 0.77 | 0.47 | 0.19 | 1.31 | 0.27 | 21.5 | 0.45 | 1.33 | 19.6 | 0.22 | 0.62 | 0.18 | 2.39 | 51.9 | 1.12 | 74.9 | 1.90 | 117  |     |
| Nishihomare      | Improved | 1979     | 4    | 246.9 | 33.9  | 64.5  | 269.6 | 93.6  | 202.1 | 154.1 | 22.7  | 5.7  | 16.8 | 72.0 | 7.1  | 6.0 | 6.6 | 7.0  | 72.4 | 15.1 | 0.74 | 0.50 | 0.21 | 1.30 | 0.29 | 21.2 | 0.52 | 1.17 | 19.6 | 0.26 | 0.57 | 0.19 | 2.29 | 38.0 | 0.92 | 50.7 | 3.50 | 126  |     |
| Norin 1          | Improved | 1931     | 2    | 206.5 | 54.2  | 86.6  | 210.1 | 351.3 | 284.7 | 142.4 | 30.9  | 5.9  | 15.6 | 71.0 | 6.9  | 6.0 | 6.2 | 6.8  | 84.2 | 17.0 | 0.76 | 0.56 | 0.20 | 1.37 | 0.28 | 20.4 | 0.50 | 1.58 | 21.9 | 0.25 | 0.79 | 0.21 | 2.24 | 46.2 | 1.08 | 65.5 | 1.94 | 93   |     |
| Norin 18         | Improved | 1941     | 3    | 315.8 | 79.0  | 126.8 | 332.1 | 124.2 | 310.5 | 248.3 | 45.0  | 5.2  | 19.6 | 72.7 | 7.1  | 5.9 | 6.7 | 7.1  | 78.4 | 11.9 | 0.66 | 0.35 | 0.15 | 1.14 | 0.19 | 23.3 | 0.47 | 1.27 | 20.9 | 0.20 | 0.60 | 0.17 | 2.35 | 50.8 | 1.04 | 72.1 | 2.55 | 136  |     |
| Norin 22         | Improved | 1943     | 3    | 167.4 | 34.4  | 65.0  | 199.5 | 330.1 | 200.5 | 128.4 | 20.9  | 5.7  | 18.1 | 77.3 | 7.7  | 5.9 | 7.7 | 7.8  | 85.6 | 19.3 | 0.78 | 0.66 | 0.23 | 1.37 | 0.32 | 21.2 | 0.52 | 1.51 | 23.2 | 0.25 | 0.73 | 0.21 | 2.29 | 52.9 | 1.06 | 80.0 | 2.10 | 116  |     |
| Norin 29         | Improved | 1945     | 3    | 248.8 | 56.5  | 107.5 | 281.4 | 346.6 | 290.3 | 196.8 | 36.5  | 6.3  | 14.6 | 64.0 | 6.0  | 6.4 | 5.0 | 5.7  | 73.1 | 14.3 | 0.69 | 0.44 | 0.20 | 1.29 | 0.27 | 20.5 | 0.51 | 1.19 | 18.8 | 0.25 | 0.62 | 0.20 | 2.14 | 29.0 | 0.84 | 34.5 | 3.86 | 121  |     |
| Norin 6          | Improved | 1936     | 2    | 247.3 | 39.8  | 96.4  | 301.7 | 336.1 | 292.4 | 150.9 | 33.3  | 6.6  | 17.0 | 60.5 | 5.2  | 7.0 | 4.9 | 5.1  | 77.4 | 12.5 | 0.65 | 0.33 | 0.16 | 1.19 | 0.19 | 19.1 | 0.50 | 1.01 | 18.3 | 0.27 | 0.51 | 0.20 | 2.22 | 11.9 | 0.61 | 14.2 | 5.60 | 119  |     |
| Norin 8          | Improved | 1937     | 2    | 225.6 | 39.2  | 83.6  | 228.7 | 341.1 | 235.3 | 142.1 | 30.6  | 5.2  | 16.8 | 81.7 | 8.5  | 5.4 | 8.1 | 8.4  | 85.4 | 16.4 | 0.86 | 0.60 | 0.19 | 1.52 | 0.29 | 23.0 | 0.50 | 1.20 | 18.9 | 0.23 | 0.58 | 0.16 | 2.30 | 53.2 | 1.10 | 77.2 | 2.00 | 121  |     |
| Notohikari       | Improved | 1985     | 5    | 175.9 | 43.7  | 51.1  | 140.6 | 177.3 | 124.6 | 124.0 | 14.3  | 5.9  | 16.3 | 80.0 | 8.4  | 5.2 | 7.4 | 8.3  | 77.8 | 19.2 | 0.83 | 0.70 | 0.24 | 1.52 | 0.39 | 22.7 | 0.56 | 1.38 | 21.6 | 0.25 | 0.69 | 0.20 | 2.23 | 14.3 | 0.64 | 13.7 | 5.65 | 99   |     |
| Okajiri          | Improved | 1996     | 5    | 250.5 | 109.3 | 97.1  | 208.6 | 161.1 | 268.4 | 172.9 | 33.2  | 5.6  | 16.6 | 85.3 | 9.0  | 4.6 | 8.0 | 8.8  | 65.9 | 12.6 | 0.73 | 0.44 | 0.19 | 1.26 | 0.26 | 20.0 | 0.46 | 1.39 | 17.1 | 0.24 | 0.66 | 0.19 | 2.33 | 46.8 | 1.14 | 62.9 | 1.71 | 101  |     |
| Omachi           | JRC32    | Landrace | -    | 1     | 269.9 | 71.6  | 109.9 | 350.1 | 323.3 | 280.3 | 259.5 | 42.1 | 6.4  | 16.3 | 66.3 | 6.0 | 5.5 | 5.9  | 6.0  | 99.1 | 15.8 | 0.54 | 0.40 | 0.16 | 1.58 | 0.08 | 25.8 | 0.50 | 1.13 | 19.8 | 0.20 | 0.48 | 0.10 | 2.24 | 35.4 | 0.89 | 48.2 | 3.81 | 134 |
| Oochikara        | Improved | 1989     | 5    | 259.7 | 125.2 | 96.8  | 235.1 | 260.4 | 182.8 | 222.9 | 39.3  | 7.5  | 17.3 | 72.7 | 7.6  | 5.7 | 6.0 | 7.0  | 86.0 | 16.1 | 1.11 | 0.80 | 0.20 | 1.47 | 0.37 | 31.0 | 0.53 | 2.11 | 24.3 | 0.17 | 0.77 | 0.13 | 3.02 | 39.1 | 1.07 | 56.2 | 2.75 | -    |     |
| Osu 197          | Improved | 1937     | 2    | 237.8 | 55.7  | 78.8  | 184.9 | 231.7 | 243.0 | 121.9 | 28.0  | 5.7  | 18.6 | 75.0 | 7.5  | 5.8 | 7.0 | 7.4  | 96.1 | 15.2 | 0.70 | 0.45 | 0.16 | 1.21 | 0.19 | 23.7 | 0.52 | 1.42 | 22.4 | 0.23 | 0.67 | 0.18 | 2.35 | 31.9 | 0.85 | 42.0 | 4.29 | 102  |     |
| Osu 292          | Improved | 1974     | 4    | 243.9 | 82.3  | 93.0  | 189.6 | 186.0 | 245.3 | 186.6 | 34.6  | 6.1  | 16.3 | 78.7 | 8.2  | 5.3 | 7.0 | 8.0  | 80.9 | 15.2 | 0.75 | 0.51 | 0.19 | 1.38 | 0.26 | 22.4 | 0.47 | 1.15 | 18.1 | 0.21 | 0.58 | 0.17 | 2.22 | 42.7 | 1.02 | 57.3 | 2.64 | -    |     |
| Raiden           | JRC53    | Landrace | -    | 1     | 265.7 | 55.6  | 99.4  | 301.9 | 307.0 | 225.4 | 221.9 | 30.4 | 6.4  | 16.3 | 69.0 | 6.5 | 6.3 | 6.3  | 6.5  | 79.0 | 14.0 | 0.79 | 0.47 | 0.18 | 0.81 | 0.12 | 25.2 | 0.56 | 1.50 | 21.9 | 0.22 | 0.61 | 0.11 | 2.39 | 14.2 | 0.63 | 16.7 | 5.89 | 129 |
| Reihou           | Improved | 1969     | 4    | 256.7 | 73.4  | 122.4 | 334.8 | 260.4 | 180.3 | 43.8  | 5.9   | 15.4 | 74.0 | 7.2  | 6.1  | 7.2 | 7.2 | 77.0 | 11.3 | 0.64 | 0.32 | 0.15 | 1.13 | 0.18 | 22.8 | 0.41 | 1.41 | 21.2 | 0.19 | 0.69 | 0.18 | 2.29 | 55.7 | 1.15 | 80.9 | 1.82 | 126  |      |     |
| Reimei           | Improved | 1966     | 4    | 358.8 | 83.8  | 148.7 | 318.2 | 319.5 | 351.2 | 277.9 | 58.2  | 6.0  | 17.6 | 73.0 | 7.1  | 6.1 | 6.9 | 7.1  | 84.9 | 14.2 | 0.80 | 0.51 | 0.17 | 1.35 | 0.25 | 23.0 | 0.50 | 1.54 | 19.8 | 0.22 | 0.72 | 0.17 | 2.38 | 29.4 | 0.82 | 41.0 | 4.09 | 91   |     |
| Rikutoauriku 2   | JRC49    | Landrace | -    | 1     | 266.2 | 98.0  | 115.4 | 243.8 | 325.3 | 256.5 | 302.9 | 39.9 | 5.9  | 16.3 | 76.7 | 7.8 | 5.6 | 7.3  | 7.7  | 98.2 | 12.0 | 0.62 | 0.31 | 0.12 | 1.06 | 0.13 | 22.8 | 0.56 | 0.90 | 17.7 | 0.25 | 0.43 | 0.15 | 2.35 | 29.2 | 0.79 | 43.4 | 4.24 | 102 |
| Rikuu 132        | Improved | 1921     | 2    | 317.8 | 114.6 | 157.7 | 284.8 | 384.1 | 312.6 | 249.2 | 55.6  | 5.6  | 15.3 | 80.7 | 8.4  | 5.3 | 7.6 | 8.3  | 59.7 | 10.7 | 0.71 | 0.34 | 0.18 | 1.20 | 0.23 | 20.1 | 0.45 | 1.50 | 18.1 | 0.23 | 0.70 | 0.19 | 2.40 | 27.0 | 0.83 | 35.9 | 3.96 | 95   |     |
| Rikuu 20         | Improved | 1915     | 2    | 257.4 | 45.1  | 105.1 | 273.5 | 298.8 | 244.1 | 41.8  | 6.0   | 17.1 | 77.0 | 7.8  | 5.6  | -   | 7.7 | 78.1 | 13.6 | 0.87 | 0.44 | 0.18 | 1.43 | 0.23 | 24.8 | 0.44 | 1.66 | 19.0 | 0.18 | 0.76 | 0.15 | 2.41 | 43.4 | 1.06 | 59.2 | 2.34 | 102  |      |     |
| Sachikaze        | Improved | 1960     | 4    | 247.6 | 42.8  | 106.9 | 298.3 | 260.1 | 297.5 | 175.8 | 33.7  | 5.5  | 16.5 | 80.7 | 8.3  | 5.4 | 8.0 | 8.3  | 79.0 | 13.7 | 0.68 | 0.43 | 0.17 | 1.16 | 0.21 | 21.2 | 0.46 | 1.26 | 19.0 | 0.22 | 0.59 | 0.17 | 2.37 | 46.3 | 1.02 | 66.2 | 2.59 | -    |     |
| Sakihikari       | Improved | 2003     | 6    | 242.2 | 40.4  | 85.9  | 273.2 | 301.4 | 293.8 | 29.4  | 5.4   | 14.2 | 81.5 | 8.6  | 5.0  | 7.4 |     |      |      |      |      |      |      |      |      |      |      |      |      |      |      |      |      |      |      |      |      |      |     |
