# Supplementary material
Source: publisher figshare collection journal article supplement (https://tandf.figshare.com/articles/dataset/_/7370081)
Supplement: Supplementary file 4 [file 1 › tbbb_a_1547624_sm1235.pdf]

**Supplemental Table 3.** Year-to-year correlation coefficients for (Pearson's  $r$ ) among endosperm enzyme activities and eating-quality traits.

| Trait                           | Correlation |
|---------------------------------|-------------|
| Endosperm enzyme activity       |             |
| $\alpha$ -amylase               | 0.27 **     |
| $\beta$ -amylase                | 0.23 **     |
| $\alpha$ -glucosidase           | 0.20 *      |
| $\alpha$ -mannosidase           | 0.26 **     |
| $\alpha$ -galactosidase         | 0.23 **     |
| $\beta$ -galactosidase          | 0.21 **     |
| $\beta$ -glucanase              | 0.31 ***    |
| $\beta$ -xylanase               | 0.20 *      |
| Protein content                 | 0.54 ***    |
| Amylose content                 | -0.05       |
| Cooked Rice Taste Analyzer      |             |
| Eating-quality score            | 0.29 ***    |
| Tensipresser                    |             |
| Hardness of the grain surface I | 0.18 *      |
| Stickiness of the grain surface | 0.29 ***    |
| Hardness of the whole grain H   | 0.21 **     |
| Stickiness of the whole grain S | 0.19 *      |

Significance levels: \* $P < 0.05$ , \*\* $P < 0.01$ , and \*\*\* $P < 0.001$ .
