# Supplementary material
Source: publisher figshare collection journal article supplement (https://tandf.figshare.com/articles/dataset/_/7370081)
Supplement: Supplementary file 4 [file 1 › tbbb_a_1547624_sm1238.pdf]

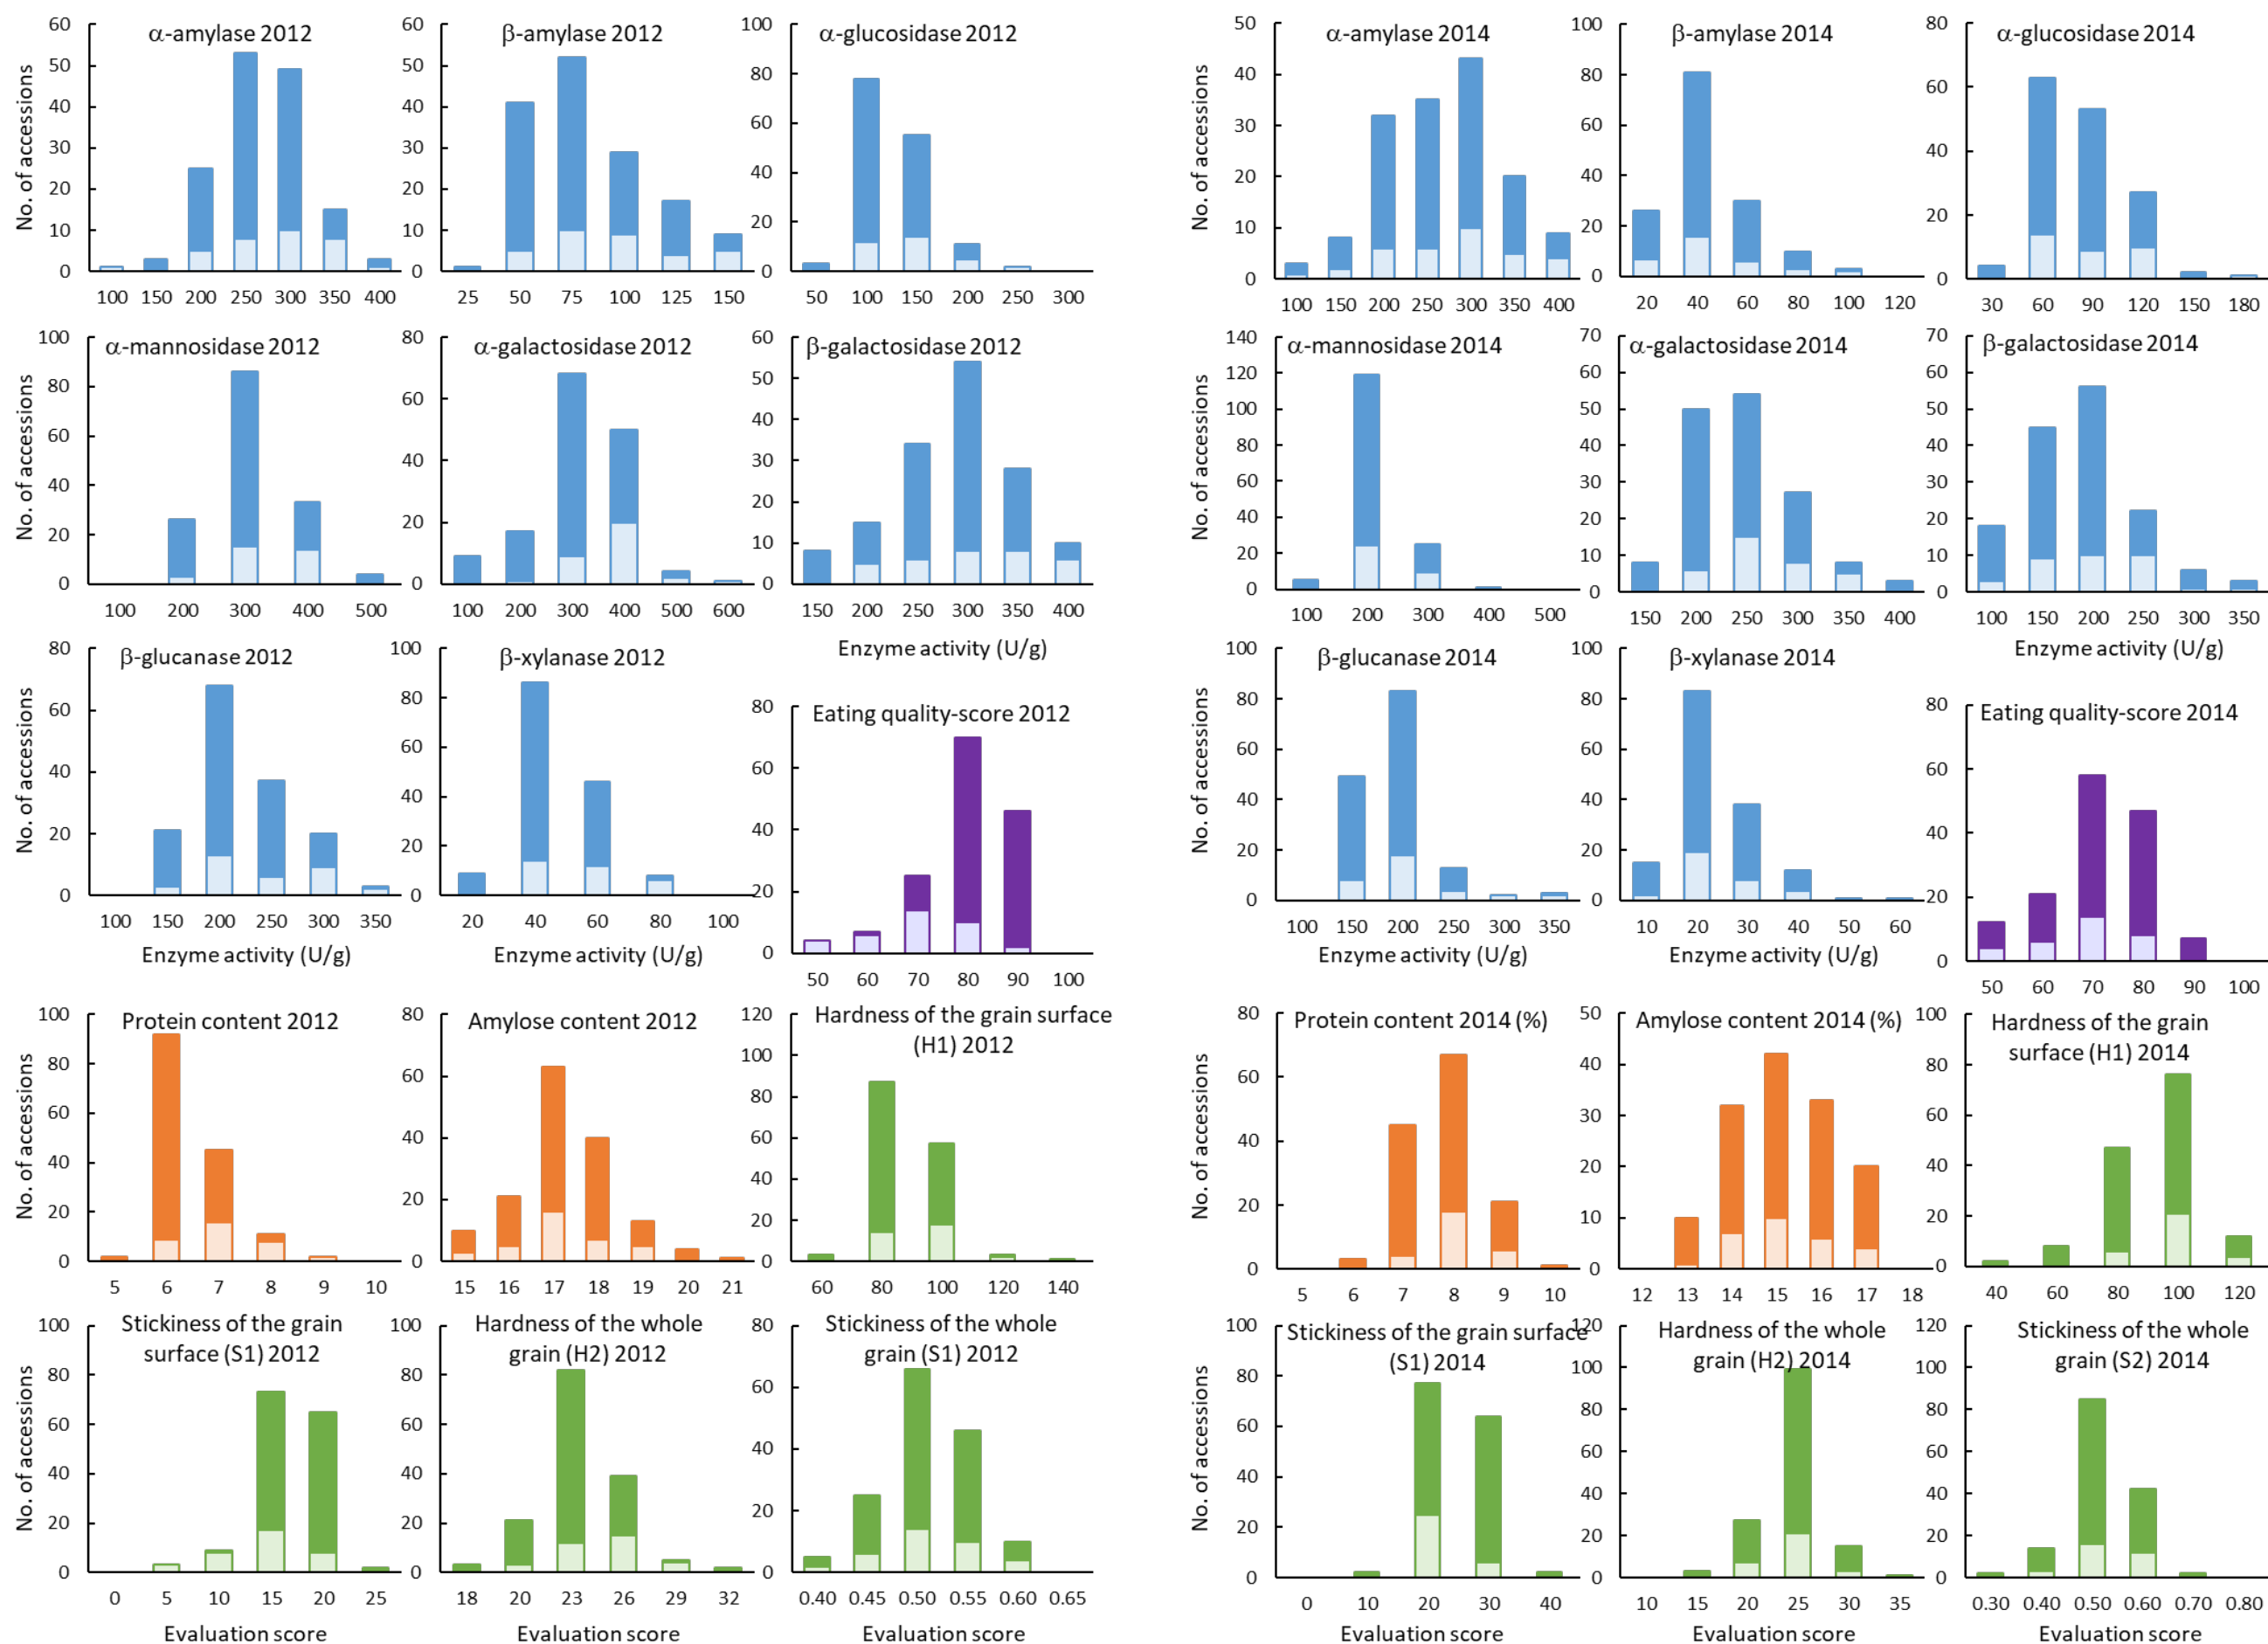

**Supplemental Figure 2.** Frequency distributions of endosperm enzyme activity values and evaluation scores for eating-quality traits in the 152 Japanese rice cultivars in 2012 and 2014. Pale bars, landraces; dark bars, improved cultivars.
